# Supplementary material
Source: PubMed Central journal article supplement (PMC3638170)
Supplement: supp_amiajnl-2011-000701_amiajnl-2011-000701-s1.pdf [file supp_amiajnl-2011-000701_amiajnl-2011-000701-s1.pdf]

## APPENDIX

### Diagnoses and Associated ICD9-CM Codes

---

| Diagnosis                   | Associated ICD9-CM Codes                                                     |
|-----------------------------|------------------------------------------------------------------------------|
| Asthma                      | 493 (excluding 493.81)                                                       |
| Bronchitis                  | 466, 490                                                                     |
| COPD Exacerbation           | 491.21, 491.22                                                               |
| Otitis Media                | 382                                                                          |
| Pharyngitis                 | 462, 463, 465.0, 472.1, 472.2, 474.00, 474.02                                |
| Pneumonia                   | 003.22, 038.2, 136.3, 481, 482, 483, 484.3, 484.5,<br>484.8, 485, 486, 507.0 |
| Sinusitis                   | 461, 473                                                                     |
| Strep Pharyngitis           | 034.0, 038.0, 041.00, 041.01                                                 |
| Upper Respiratory Infection | 460, 465.8, 465.9                                                            |

---
